# Supplementary material for: Myelin dysfunction drives amyloid-β deposition in models of Alzheimer’s disease
Source: Springer Nature journal article supplement (doi:10.1038/s41586-023-06120-6), 2023-05-31

---

**Supplementary information**

---

# **Myelin dysfunction drives amyloid- $\beta$ deposition in models of Alzheimer's disease**

---

In the format provided by the  
authors and unedited

## Supplementary Information Figure Guide

**SI Figure 1.** Source data for western blot analysis

**SI Figure 2.** Myelination and gliosis in myelin mutant and aged mice (SI for Extended Data Figures 1d)

**SI Figure 3.** Assessment of *in toto* amyloid burden by light sheet microscopy

### Supplementary Table 1.

**Tab 1.** Bulk RNA-seq DESeq2 analysis result summary

**Tab 2.** snRNA-seq individual sample preprocessing parameters

**Tab 3.** Microglia subsets analysis parameters

**Tab 4.** 3-month-old snRNA-seq microglia subpopulation marker gene list

**Tab 5.** 6-month-old snRNA-seq microglia subpopulation marker gene list

**Tab 6.** 6-month-old snRNA-seq microglia subset Myelin DAM vs Amyloid DAM DEGs

**Tab 7.** 6-month-old snRNA-seq microglia subset within DAM subpopulation s DEG analysis

**Tab 8.** Bulk RNA-seq DEG (adjP<0.01) expression in TPM and corresponding kmeans cluster

### Supplementary Table 2.

**Tab 1.** GSEA biological process enrichment analysis for DEGs between Cnp<sup>-/-</sup> 5xFAD vs 5xFAD

**Tab 2.** Gprofiler biological process enrichment analysis for DEGs between Cnp<sup>-/-</sup> 5xFAD vs 5xFAD

**Tab 3.** GSEA biological pathways enrichment analysis for DEGs between Cnp<sup>-/-</sup> 5xFAD vs 5xFAD

**Tab 4.** Gprofiler biological pathways enrichment analysis for DEGs between Cnp<sup>-/-</sup> 5xFAD vs 5xFAD

**Tab 5-14.** Gprofiler biological process enrichment analysis for DEGs in clusters 1 to 10.

## Supplementary Information Figure legends

**SI Figure 1.** Source data for western blot analysis

(a-j) Uncropped Western blot raw data. Molecular weight marker is indicated

on the left (given in kDa). Red boxes indicate cropped regions as presented in the figures and the extended data figures. For normalisation, fast green total protein staining was performed on the same blot. Corresponding figure/extended data figure is indicated above each blot.

**SI Figure 2. Myelination and gliosis in myelin mutant and aged mice (SI for Extended Data Figures 1d).**

(a) Raw data shown as heatmap in Extended Data Figure 1 d. The percentage area positive for immunostaining (MBP for myelin profiles, GFAP for astrogliosis and IBA1 for microgliosis) was quantified in the indicated ROIs. m: months. Bars represent means; dots represent individual mice/biological replicate/n (n=3 per group). Statistical analysis: ordinary one-way ANOVA (p-value is given in graphs).

(b) Results of Tukey's posthoc test for all comparisons after ordinary one-way ANOVA on data shown in (a).

**SI Figure 3. Assessment of *in toto* amyloid burden by light sheet microscopy**

(I) Brains were subjected to *in toto* staining with the  $\beta$ -sheet dye Congo Red according to a modified iDisco protocol (see Material and Methods) followed by clearing in Ethylcinnamate (Eci).

(II) Cleared brains were imaged on an Ultramicroscope II (LaVision-Biotech) light sheet setup to obtain sagittal optical slices.

(III) Raw data were visualised and analysed in Arivis Vision 4D using manual region of interest annotation for hippocampus and cortex and automated plaque segmentation (intensity-thresholding: 3-month-old *5xFAD*, blobfinder algorithm: 6-month-old *5xFAD*, machine learning: 6-month-old *App<sup>NLGF</sup>*).

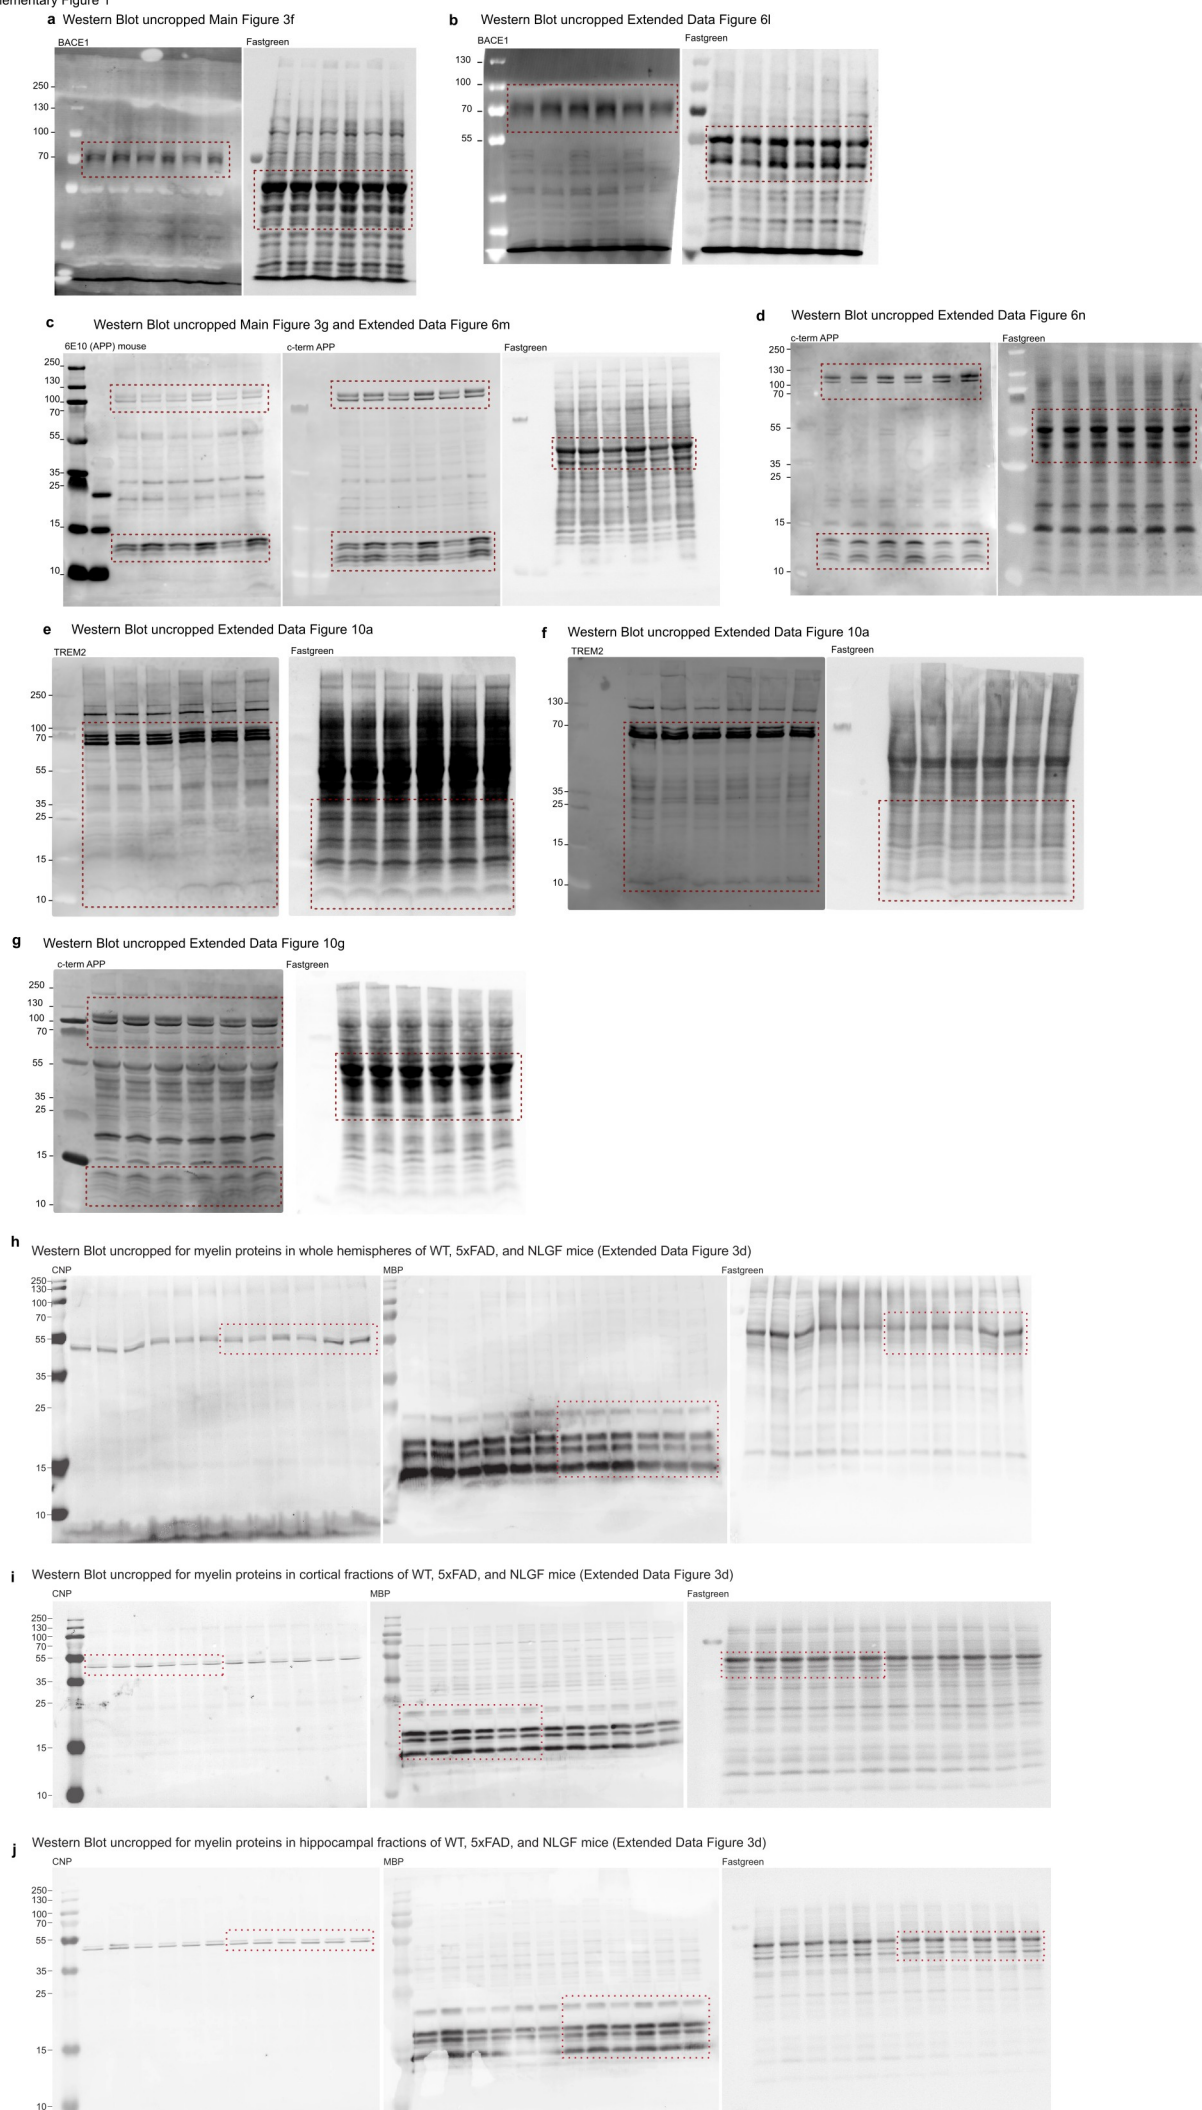

**a** Quantification of gliosis and myelin content in myelin mutants

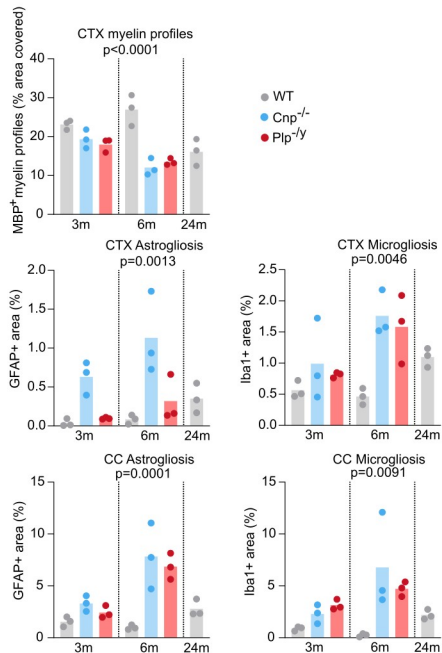

**b**

Statistical analysis

| Comparisons                                     | CTX     |         |        | CC     |         |
|-------------------------------------------------|---------|---------|--------|--------|---------|
|                                                 | Myelin  | GFAP    | Iba1   | GFAP   | Iba1    |
| WT 6m vs. Cnp <sup>-/-</sup> 6m                 | <0.0001 | 0.0027  | 0.0092 | 0.0005 | 0.0087  |
| WT 6m vs. Plp <sup>-/-</sup> 6m                 | 0.0002  | 0.9075  | 0.0274 | 0.0021 | 0.1031  |
| WT 6m vs. WT 24m                                | 0.0016  | 0.8504  | 0.3925 | 0.6962 | 0.8357  |
| WT 6m vs. WT 3m                                 | 0.5245  | >0.9999 | 0.9998 | 0.9986 | 0.9994  |
| WT 6m vs. Cnp <sup>-/-</sup> 3m                 | 0.0291  | 0.1898  | 0.5856 | 0.4384 | 0.8052  |
| WT 6m vs. Plp <sup>-/-</sup> 3m                 | 0.0083  | >0.9999 | 0.8965 | 0.8561 | 0.4881  |
| Cnp <sup>-/-</sup> 6m vs. Plp <sup>-/-</sup> 6m | 0.9903  | 0.0211  | 0.9959 | 0.9728 | 0.8021  |
| Cnp <sup>-/-</sup> 6m vs. WT 24m                | 0.4646  | 0.0275  | 0.3413 | 0.0077 | 0.0914  |
| Cnp <sup>-/-</sup> 6m vs. WT 3m                 | 0.0013  | 0.0018  | 0.0171 | 0.0011 | 0.0188  |
| Cnp <sup>-/-</sup> 6m vs. Cnp <sup>-/-</sup> 3m | 0.0369  | 0.2675  | 0.2054 | 0.0175 | 0.102   |
| Cnp <sup>-/-</sup> 6m vs. Plp <sup>-/-</sup> 3m | 0.1227  | 0.003   | 0.0753 | 0.0044 | 0.2516  |
| Plp <sup>-/-</sup> 6m vs. WT 24m                | 0.8497  | >0.9999 | 0.6681 | 0.0368 | 0.6343  |
| Plp <sup>-/-</sup> 6m vs. WT 3m                 | 0.0047  | 0.8163  | 0.0504 | 0.0051 | 0.2057  |
| Plp <sup>-/-</sup> 6m vs. Cnp <sup>-/-</sup> 3m | 0.1255  | 0.7439  | 0.467  | 0.0818 | 0.6716  |
| Plp <sup>-/-</sup> 6m vs. Plp <sup>-/-</sup> 3m | 0.3564  | 0.928   | 0.2024 | 0.0208 | 0.9303  |
| WT 24m vs. WT 3m                                | 0.0476  | 0.7404  | 0.579  | 0.9203 | 0.9687  |
| WT 24m vs. Cnp <sup>-/-</sup> 3m                | 0.6839  | 0.8193  | 0.9998 | 0.9991 | >0.9999 |
| WT 24m vs. Plp <sup>-/-</sup> 3m                | 0.9642  | 0.8776  | 0.9557 | 0.9999 | 0.9946  |
| WT 3m vs. Cnp <sup>-/-</sup> 3m                 | 0.5447  | 0.1329  | 0.777  | 0.7164 | 0.9566  |
| WT 3m vs. Plp <sup>-/-</sup> 3m                 | 0.2205  | >0.9999 | 0.978  | 0.9835 | 0.7322  |
| Cnp <sup>-/-</sup> 3m vs. Plp <sup>-/-</sup> 3m | 0.9912  | 0.2101  | 0.9955 | 0.9849 | 0.997   |

# Protocol *in toto* amyloid plaque burden

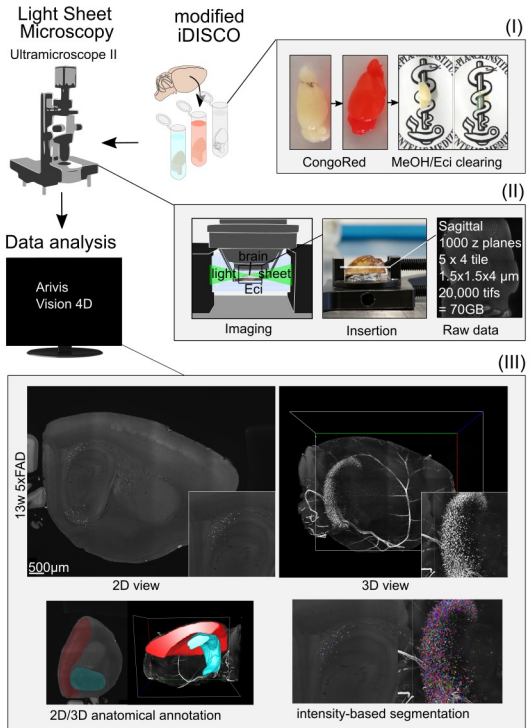

Supplement: MOESM1 [file 41586_2023_6120_MOESM1_ESM.pdf]
